# Supplementary material for: Decrease in Ambient Fine Particulate Matter during COVID-19 Crisis and Corresponding Health Benefits in Seoul, Korea
Source: PubMed Central journal article supplement (PMC7432095; doi:10.3390/ijerph17155279), 2020-07-22
Supplement: ijerph-17-05279-s001.pdf [file ijerph-17-05279-s001.pdf]

Table S1. Concentration-response functions used in the study.

| Relative risk per 10 $\mu\text{g}/\text{m}^3$ increase of $\text{PM}_{2.5}$ | Relative risk | 95% lower confidence interval | 95% upper confidence interval |
|-----------------------------------------------------------------------------|---------------|-------------------------------|-------------------------------|
| MCC study                                                                   |               |                               |                               |
| Non-accidental all-cause mortality                                          | 1.0068        | 1.0059                        | 1.0077                        |
| Cardiovascular disease mortality                                            | 1.0055        | 1.0045                        | 1.0066                        |
| Respiratory disease mortality                                               | 1.0074        | 1.0053                        | 1.0095                        |
| Seoul study                                                                 |               |                               |                               |
| Non-accidental all-cause mortality                                          | 1.0033        | 1.0001                        | 1.0066                        |
| Cardiovascular disease mortality                                            | 1.0076        | 1.0012                        | 1.0141                        |
| Respiratory disease mortality                                               | 1.0177        | 1.0055                        | 1.0301                        |

Table S2. Estimated number of mortalities attributable to PM<sub>2.5</sub> exposure from January to April in each year from 2016 to 2020

| Year        | PM <sub>2.5</sub><br>(µg/m <sup>3</sup> ) | Non-accidental mortality<br>(N) | Cardiovascular mortality<br>(N) | Respiratory mortality<br>(N) |
|-------------|-------------------------------------------|---------------------------------|---------------------------------|------------------------------|
| MCC study   |                                           |                                 |                                 |                              |
| 2016        | 28.1                                      | 237.9 (206.7, 268.9)            | 43.1 (35.3, 51.6)               | 28.8 (20.7, 36.8)            |
| 2017        | 31.7                                      | 260.4 (226.3, 294.3)            | 49.9 (40.9, 59.7)               | 31.2 (22.5, 39.9)            |
| 2018        | 30.6                                      | 273.4 (237.7, 309.1)            | 50.9 (41.7, 60.9)               | 36.8 (26.5, 47.1)            |
| 2019        | 34.6                                      | 293.5 (255.1, 331.7)            | 54.7 (44.9, 65.5)               | 36.9 (26.5, 47.1)            |
| 2020        | 25.6                                      | 211.4 (183.7, 239.0)            | 39.4 (32.3, 47.2)               | 26.6 (19.1, 34.0)            |
| Seoul study |                                           |                                 |                                 |                              |
| 2016        | 28.1                                      | 116.1 (3.5, 230.9)              | 59.4 (9.5, 108.9)               | 67.6 (21.5, 112.5)           |
| 2017        | 31.7                                      | 127.2 (3.9, 252.8)              | 68.6 (11.0, 125.8)              | 73.3 (23.3, 121.7)           |
| 2018        | 30.6                                      | 133.6 (4.1, 265.5)              | 70.0 (11.2, 128.4)              | 86.4 (27.5, 143.5)           |
| 2019        | 34.6                                      | 143.5 (4.4, 284.9)              | 75.3 (12.0, 137.8)              | 86.3 (27.5, 143.2)           |
| 2020        | 25.6                                      | 103.2 (3.1, 205.2)              | 54.2 (8.7, 99.6)                | 62.5 (19.8, 104.2)           |

Table S3. The daily average amount of vehicles entering the Seoul Metropolitan Area highways and number of citizens who used subways of Seoul Metropolitan area from January to April each year from 2016 to 2020

|                                                                                                               | Year 2016 | Year 2017 | Year 2018 | Year 2019 | Year 2020 |
|---------------------------------------------------------------------------------------------------------------|-----------|-----------|-----------|-----------|-----------|
| Daily average amount of vehicles entering the Seoul metropolitan area highways<br>(N, vehicles) <sup>a)</sup> | 1432100.8 | 1441560.1 | 1344726.9 | 1382005.2 | 1315198.7 |
| Daily average number of citizens who used subways of Seoul Metropolitan area<br>(N, subjects) <sup>b)</sup>   | 13023.8   | 13449.0   | 12424.3   | 12427.1   | 9327.4    |

<sup>a)</sup> Data were retrieved from Korea Transport Database website: <https://www.ktdb.go.kr>

<sup>b)</sup> Data were retrieved from Seoul open data portal website: <http://data.seoul.go.kr>

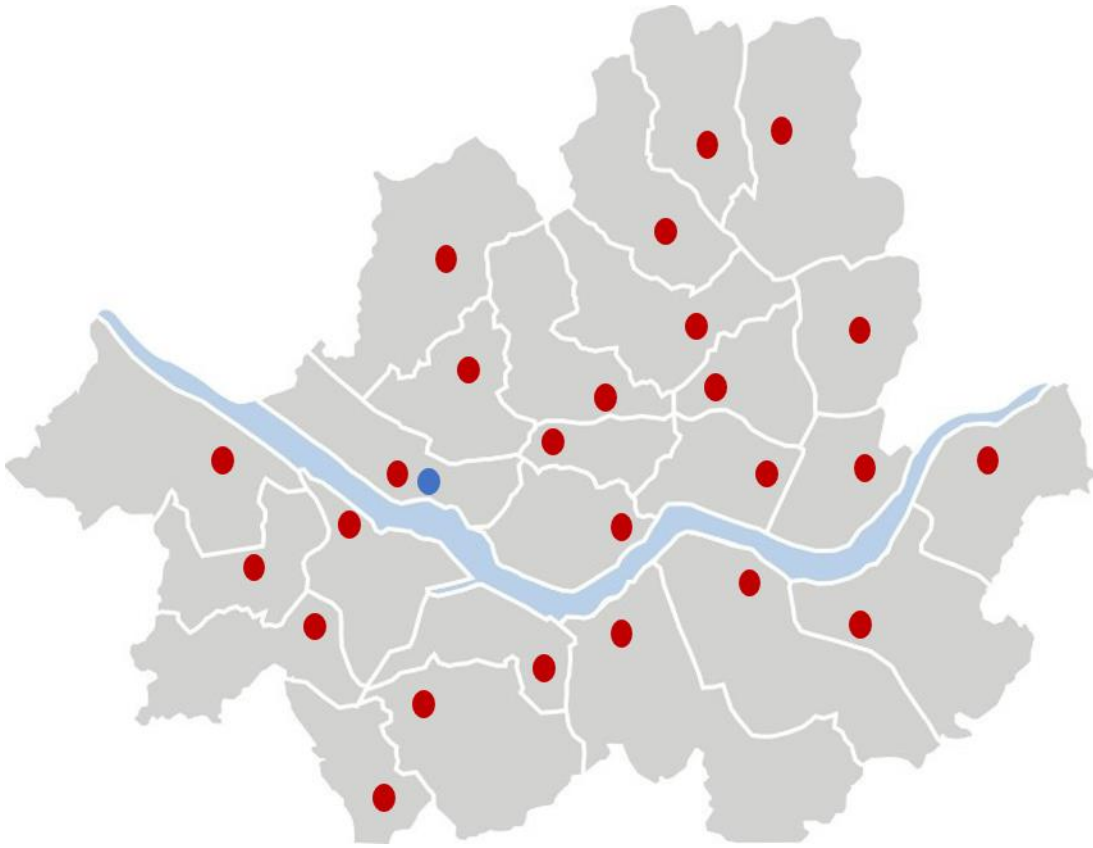

Figure S1. Locations of 25 PM<sub>2.5</sub> monitoring stations (red circle) and meteorological station (blue circle) covering Seoul

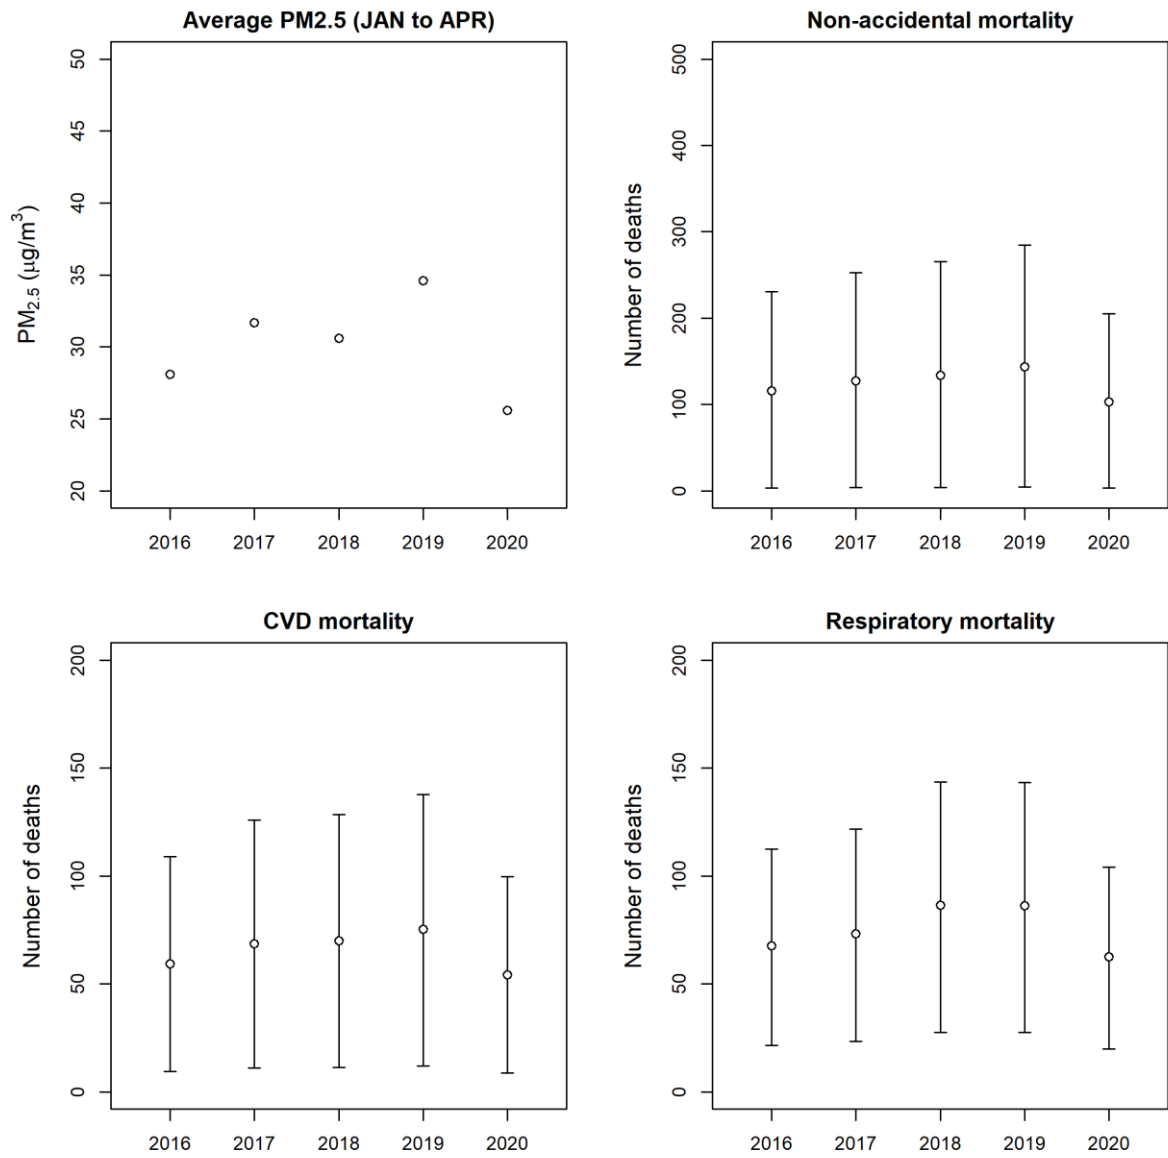

Figure S2. Average PM<sub>2.5</sub> concentration of Seoul from January to April and estimated number of mortalities attributable to PM<sub>2.5</sub> exposure (RRs from the Seoul study were used for the estimation)

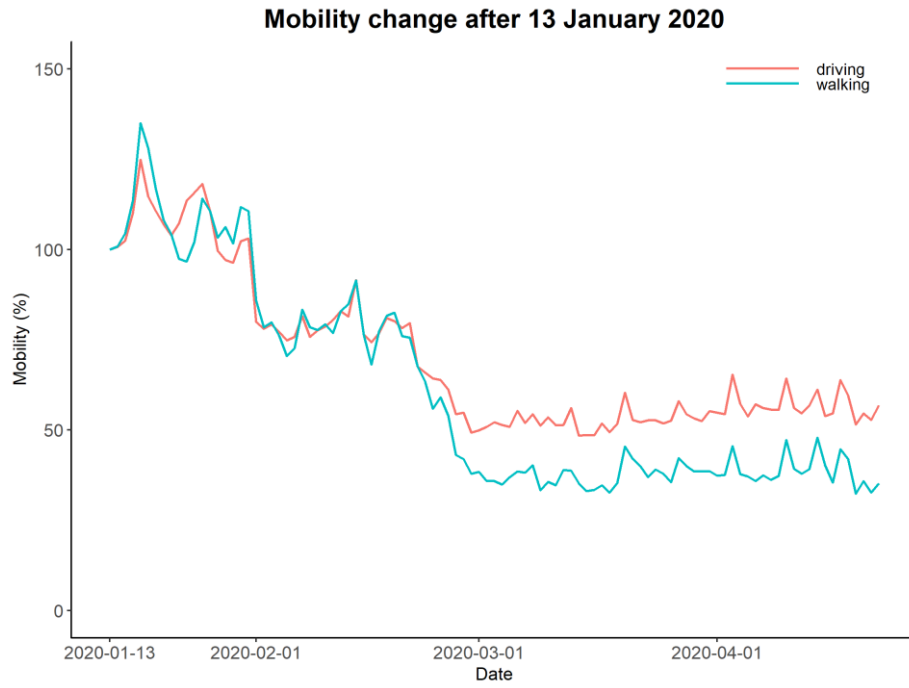

Figure S3. Mobility trends of Seoul City (Mobility on 13 January 2020 was regarded as 100%; Data was gathered from the Apple Maps Mobility Trends Reports: <https://www.apple.com/covid19/mobility/>)
